# Supplementary material for: Transcatheter Closure of Patent Ductus Arteriosus With Severe Pulmonary Artery Hypertension Through Single Venous Approach: a Propensity Score Match Analysis From Long-term Outcomes
Source: Research Square preprint supplement (doi:10.21203/rs.3.rs-524973/v1), 2021-05-18
Supplement: Supplementary file 1 [file b640d257badda9af0fa03107.docx]

　 Supplementary table1.Occluder size of PDA between SPAH and non-SPAH groups before and after propensity score matching

| Characteristics | Before matching | | | After matching | | |
| --- | --- | --- | --- | --- | --- | --- |
| SPAH (n=29) | non-SPAH (n=468) | P-value | SPAH (n=25) | non-SPAH (n=39) | P-value |
| Occluder size (mm) |  |  | ＜0.001 |  |  | 0.733 |
| 4/6mm | 0 | 74 |  | 0 | 2 |  |
| 6/8mm | 0 | 134 |  | 0 | 4 |  |
| 8/10mm | 3 | 134 |  | 3 | 6 |  |
| 10/12mm | 4 | 67 |  | 4 | 9 |  |
| 12/14mm | 2 | 31 |  | 2 | 3 |  |
| 14/16mm | 4 | 7 |  | 4 | 3 |  |
| 16/18mm | 4 | 6 |  | 3 | 2 |  |
| 18/20mm | 3 | 6 |  | 3 | 3 |  |
| 20/22mm | 4 | 3 |  | 3 | 3 |  |
| 22/24mm | 2 | 3 |  | 2 | 2 |  |
| 24/26mm | 2 | 2 |  | 1 | 1 |  |
| 26/28mm | 0 | 0 |  | 0 | 0 |  |
| 28/30mm | 0 | 1 |  | 0 | 1 |  |
| 30/32mm | 1 | 0 |  | 0 | 0 |  |
